# Supplementary material for: CuCo2S4 nanocrystals as a nanoplatform for photothermal therapy of arterial inflammation
Source: Royal Society of Chemistry journal article supplement (doi:10.1039/c9nr00772e), 2019-01-01
Supplement: c9nr00772e1.pdf [file c9nr00772e1.pdf]

## Supplementary Information

### **CuCo<sub>2</sub>S<sub>4</sub> Nanocrystals as A Nanoplatform for Photothermal Therapy of Arterial Inflammation**

Xing Zhang, Junchao Liu, Xinrui Yang, Guanjie He, Bo Li, Jinbao Qin, Paul R. Shearing, Dan J. L. Brett, Junqing Hu, Xinwu Lu

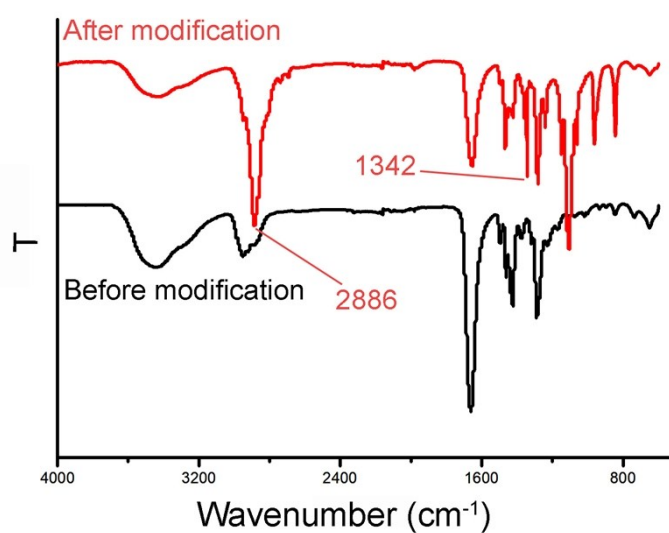

**Figure S1.** FTIR spectra of CuCo<sub>2</sub>S<sub>4</sub> NCs before and after modification. The peaks around 2886 and 1342 cm<sup>-1</sup> verified the existence of the -CH<sub>2</sub>O- groups of PEG-NH<sub>2</sub>.

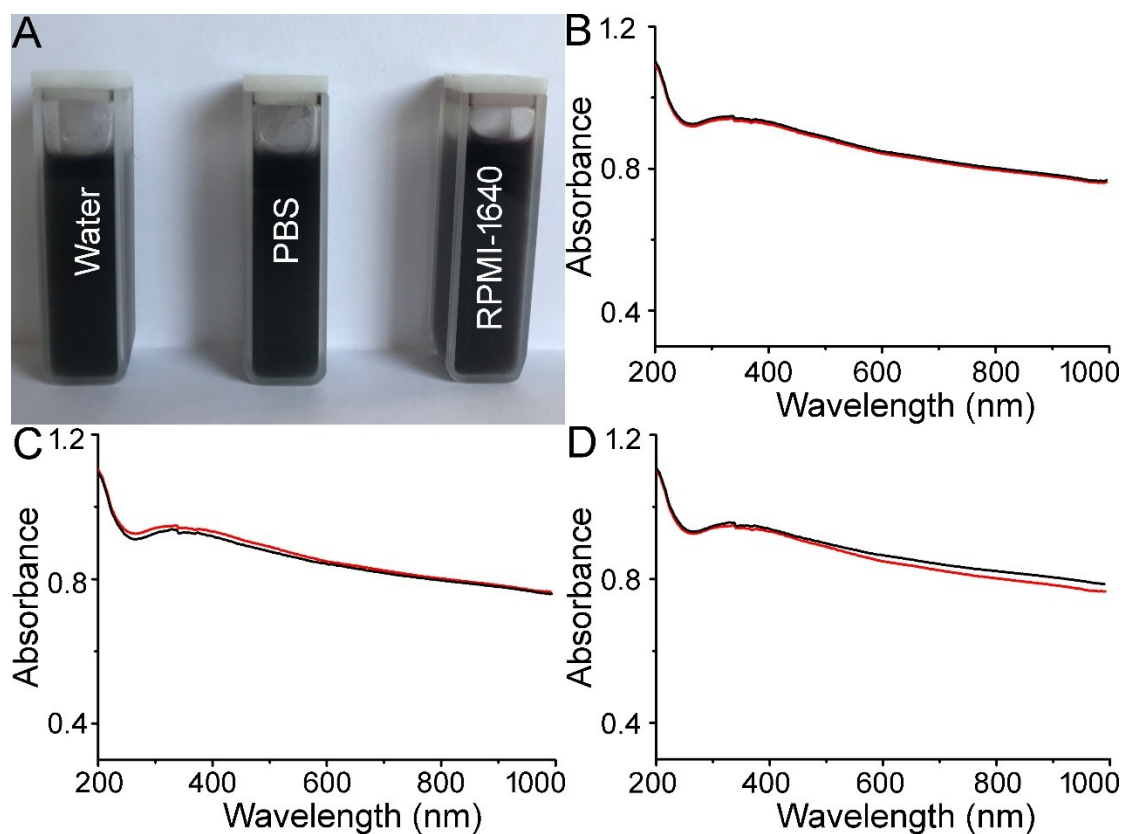

**Figure S2.** (A) A digital camera picture of the CuCo<sub>2</sub>S<sub>4</sub> NCs dispersed in water, PBS, and RPMI-1640 culture medium for a week, showing the good dispersion of nanosheets. UV-vis spectra of the freshly prepared (black line) CuCo<sub>2</sub>S<sub>4</sub> NCs and the CuCo<sub>2</sub>S<sub>4</sub> NCs stocked (red line) in (B) water, (C) PBS, and (D) RPMI-1640 culture medium under ambient conditions for a week.

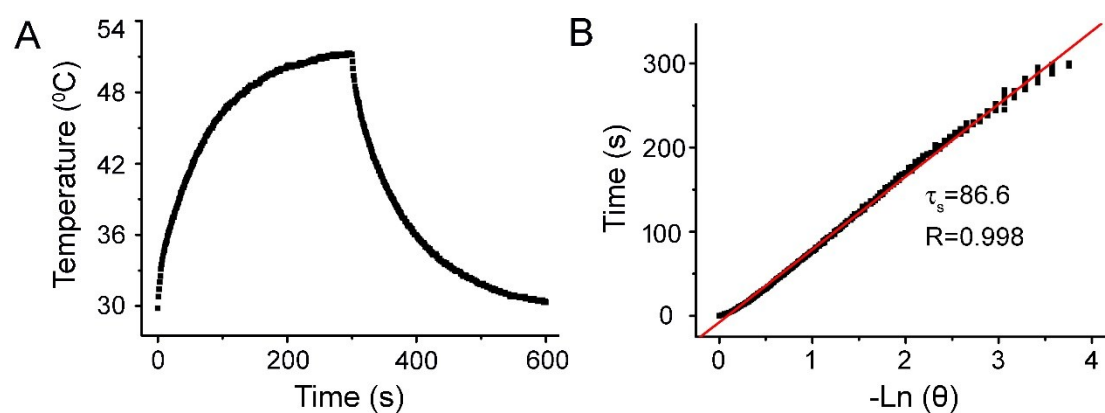

**Figure S3.** (A) Photothermal effect of lager CuCo<sub>2</sub>S<sub>4</sub> NCs upon being irradiated for 300 s (808 nm, 180 mW) and shutting off the laser. (B) Time constant for heat

transfer from the system is determined to be  $\tau_s = 86.6$  s by applying the linear time data from the cooling period of panel (A) versus negative natural logarithm of driving force temperature.

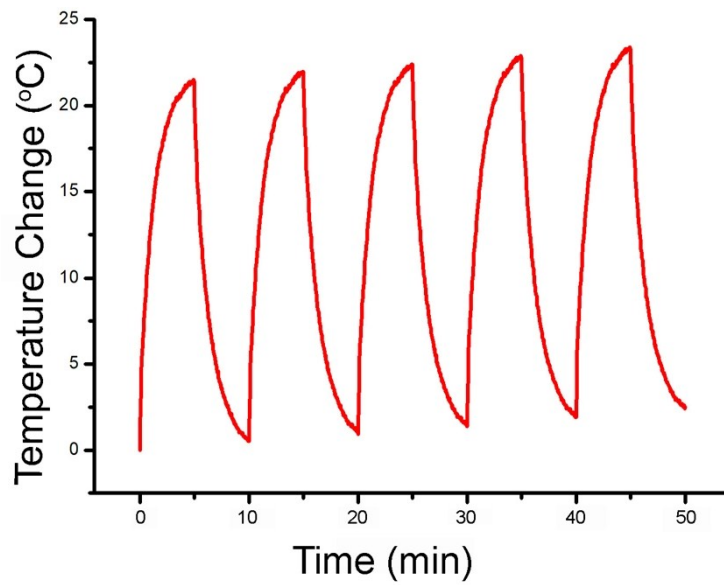

**Figure S4.** Temperature elevation of  $\text{CuCo}_2\text{S}_4$  NCs over five laser on/off cycles of NIR laser irradiation.

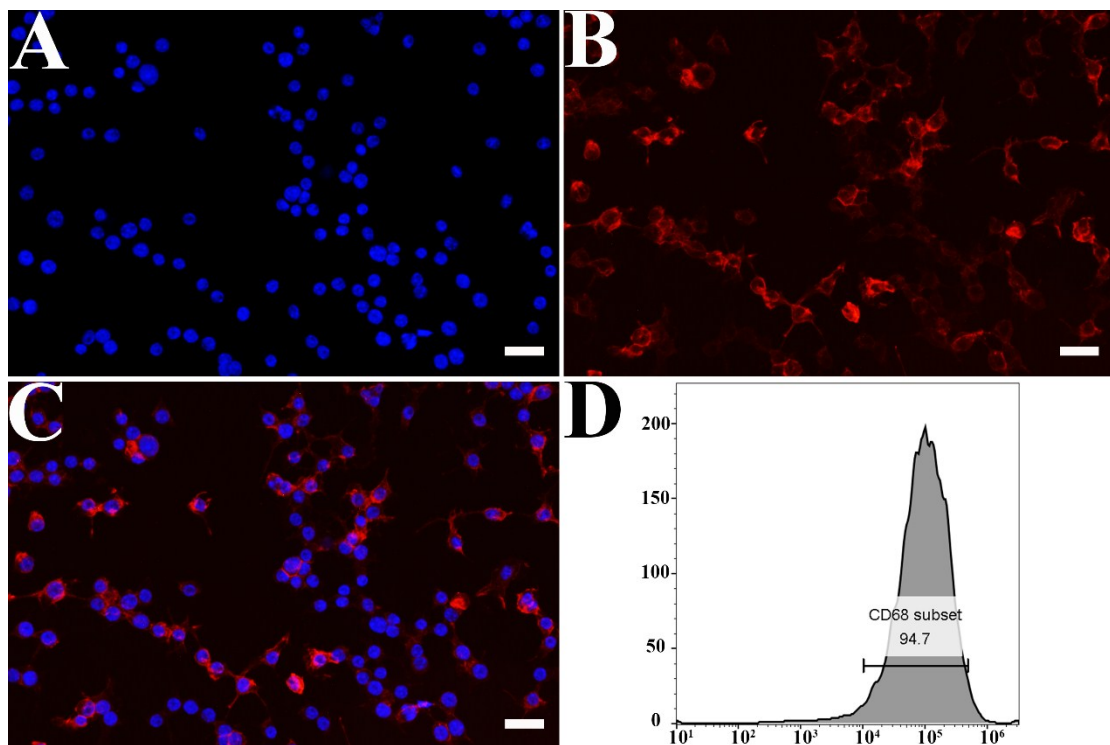

**Figure S5.** Immunofluorescence and flow cytometry identification of Raw264.7 macrophages. (A) DAPI, (B) CD68, and (C) Merge. (D) Flow cytometry, demonstrating that the purity of macrophages was 94.7%. Scale bar = 25  $\mu\text{m}$ .

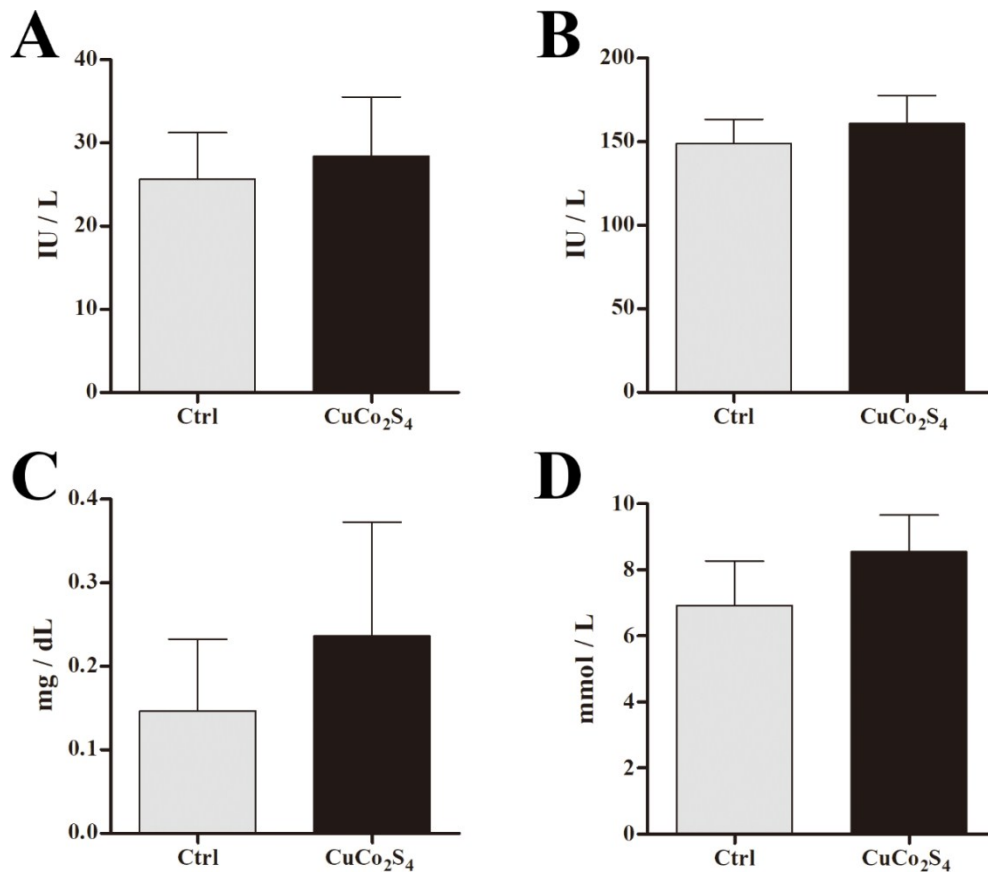

**Figure S6.** Hepatorenal function analysis. (A) ALT, (B) AST, (C) T-Bil and (D) BUN. No significant differences were detected between the CuCo<sub>2</sub>S<sub>4</sub> NCs group and control group.
